# Supplementary material
Source: PubMed Central journal article supplement (PMC6283450)
Supplement: jc.2016-3623_Supplemental_Data.pdf [file jc.2016-3623_Supplemental_Data.pdf]

# **Supplemental Data**

## **Chronic intranasal insulin does not affect hepatic lipids, but lowers circulating BCAAs in healthy male subjects**

Thomas Scherer, Peter Wolf, Sabina Smajis, Melania Gaggini, Martina Hackl, Amalia Gastaldelli, Peter Klimek, Elisa Einwallner, Rodrig Marculescu, Anton Luger, Clemens Fürnsinn, Siegfried Trattnig, Christoph Buettner, Martin Krššák, Michael Krebs

## Supplementary Figures

### Supplementary Figure 1

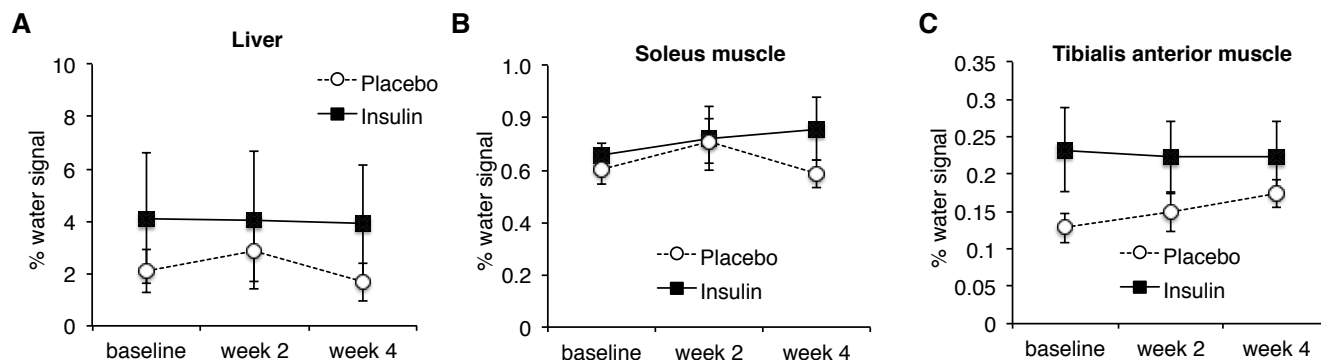

### Supplementary Fig. 1 | IN insulin application for 4 weeks does not affect hepatic lipid content.

(A) Hepatic lipid content as assessed by  $^1\text{H}$ -MRS in absolute values at baseline and after 2 and 4 weeks of IN insulin or placebo treatment. (C, D) Intramyocellular lipid content assessed by  $^1\text{H}$ -MRS at the indicated time points (baseline, week 2 and week 4) of the soleus muscle (B) and the tibialis anterior muscle (C). All error bars are SEM. N = 10 per group.

**Supplementary Table 1** | Absolute plasma amino acid (AA) levels at baseline and after 4 weeks of IN insulin or placebo treatment as assessed by GCMS.

|                    | baseline      |          | week 4   |           | p-value<br>(vs. Placebo) |      |
|--------------------|---------------|----------|----------|-----------|--------------------------|------|
|                    | Placebo       | Insulin  | Placebo  | Insulin   |                          |      |
| Histidine          | 67 ± 3        | 74 ± 4   | 70 ± 3   | 69 ± 3    | 0.81                     |      |
| Lysine             | 123 ± 9       | 144 ± 18 | 128 ± 9  | 115 ± 4   | 0.22                     |      |
| Aspartic acid      | 14 ± 3        | 16 ± 5   | 16 ± 4   | 50 ± 36   | 0.39                     |      |
| Serine             | 97 ± 12       | 107 ± 23 | 103 ± 11 | 93 ± 11   | 0.49                     |      |
| Threonine          | 47 ± 3        | 58 ± 5   | 50 ± 3   | 49 ± 4 §  | 0.88                     |      |
| Glutamate          | 47 ± 6        | 65 ± 8   | 50 ± 5   | 53 ± 6 §§ | 0.69                     |      |
| Alanine            | 255 ± 20      | 324 ± 19 | 260 ± 24 | 313 ± 24  | 0.07                     |      |
| Methionine         | 51 ± 3        | 51 ± 5   | 54 ± 3   | 49 ± 4    | 0.31                     |      |
| <b>BCAA</b>        | Valine        | 92 ± 11  | 116 ± 16 | 99 ± 13   | 83 ± 7 §                 | 0.27 |
|                    | Isoleucine    | 53 ± 4   | 64 ± 7   | 54 ± 4    | 46 ± 3 §                 | 0.14 |
|                    | Leucine       | 123 ± 9  | 150 ± 14 | 131 ± 8   | 116 ± 6 §                | 0.12 |
| <b>aromatic AA</b> | Phenylalanine | 50 ± 3   | 56 ± 3   | 55 ± 4 §  | 50 ± 2 §                 | 0.29 |
|                    | Tyrosine      | 61 ± 4   | 82 ± 10  | 64 ± 5    | 62 ± 3 §                 | 0.75 |
| Glycine            | 156 ± 8       | 195 ± 15 | 162 ± 10 | 174 ± 7   | 0.33                     |      |
| Proline            | 153 ± 15      | 202 ± 20 | 175 ± 11 | 159 ± 13  | 0.38                     |      |

Abbreviations: BCAA, branched-chain amino acids; AA amino acids

All values are mean ± SEM; N = 10 per group

§ paired TTEST (baseline vs week 4) P<0.05

§§ paired TTEST (baseline vs week 4) P<0.01

§ paired TTEST (baseline vs week 4) P=0.06
